# Supplementary material for: TopoIIα prevents telomere fragility and formation of ultra thin DNA bridges during mitosis through TRF1-dependent binding to telomeres
Source: PubMed Central journal article supplement — Cell Cycle. 2014 Mar 10;13(9):1463–81. doi: 10.4161/cc.28419 (PMC4050144; doi:10.4161/cc.28419), 2014-03-10
Supplement: cc-13-1463-s01.pdf [file cc-13-1463-s01.pdf]

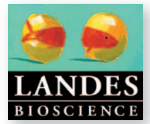

## **Supplemental Material to:**

**Martina Stagno d'Alcontres, Alejandro Palacios,  
Diego Mejias, and Maria A Blasco**

**Topolla prevents telomere fragility and formation of ultra  
thin DNA bridges during mitosis through TRF1-dependent  
binding to telomeres**

**Cell Cycle 2014; 13(9)**

**<http://dx.doi.org/10.4161/cc.28419>**

**<http://www.landesbioscience.com/journals/cc/article/28419>**

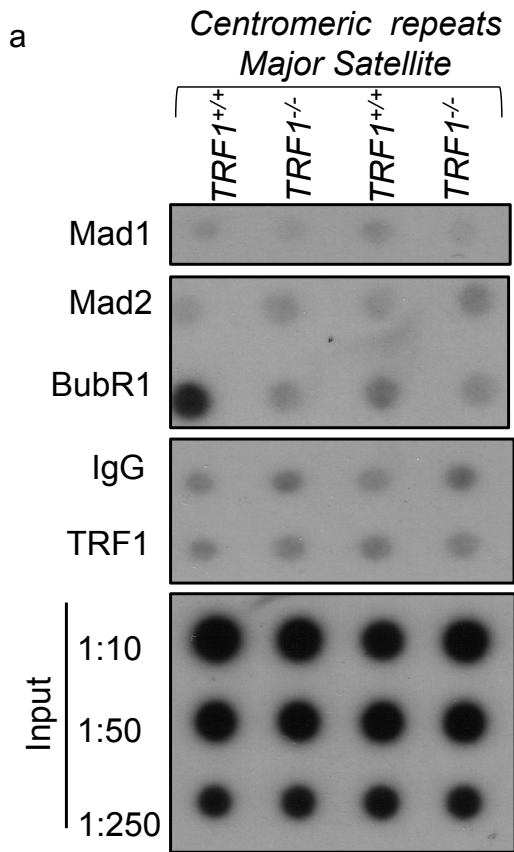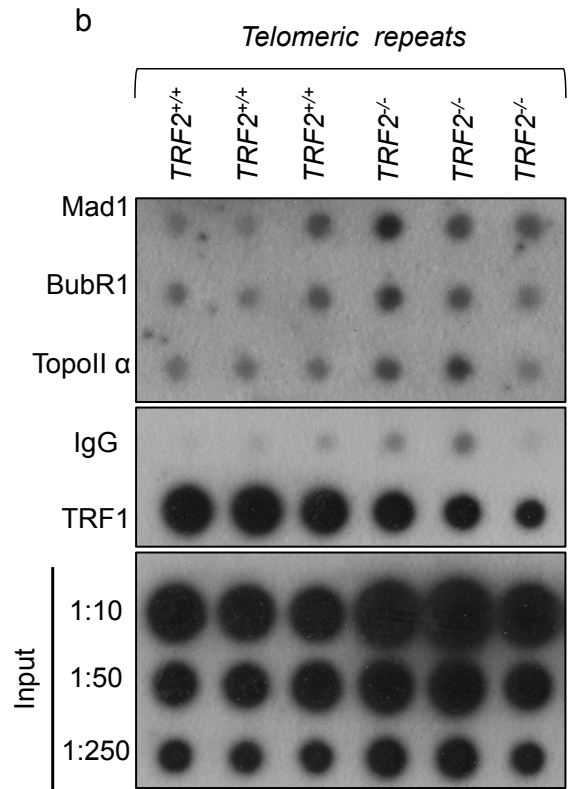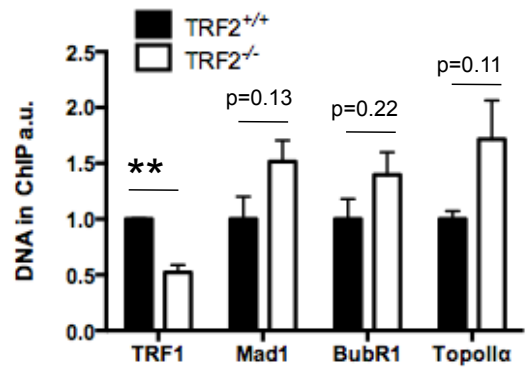

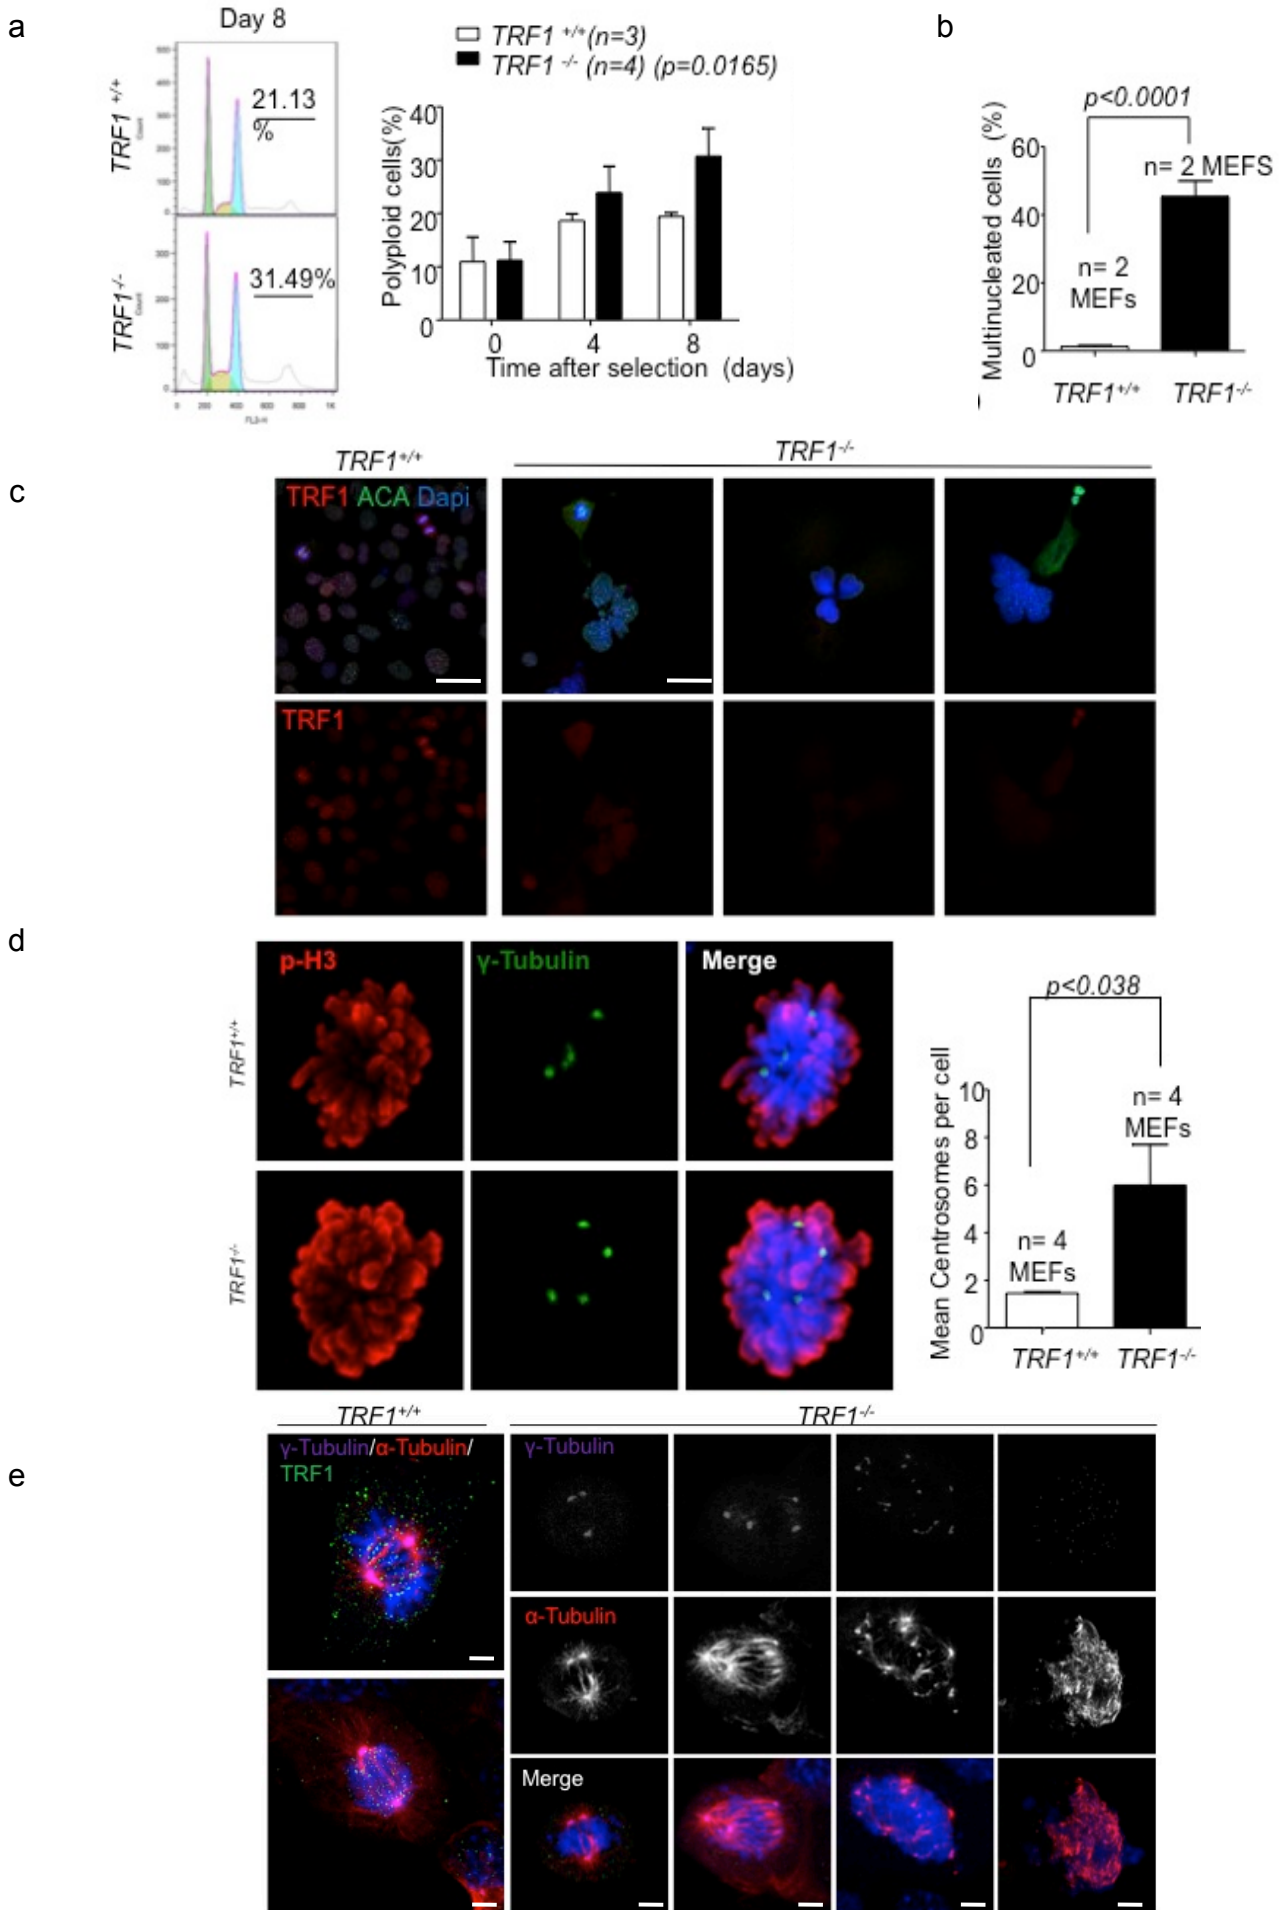

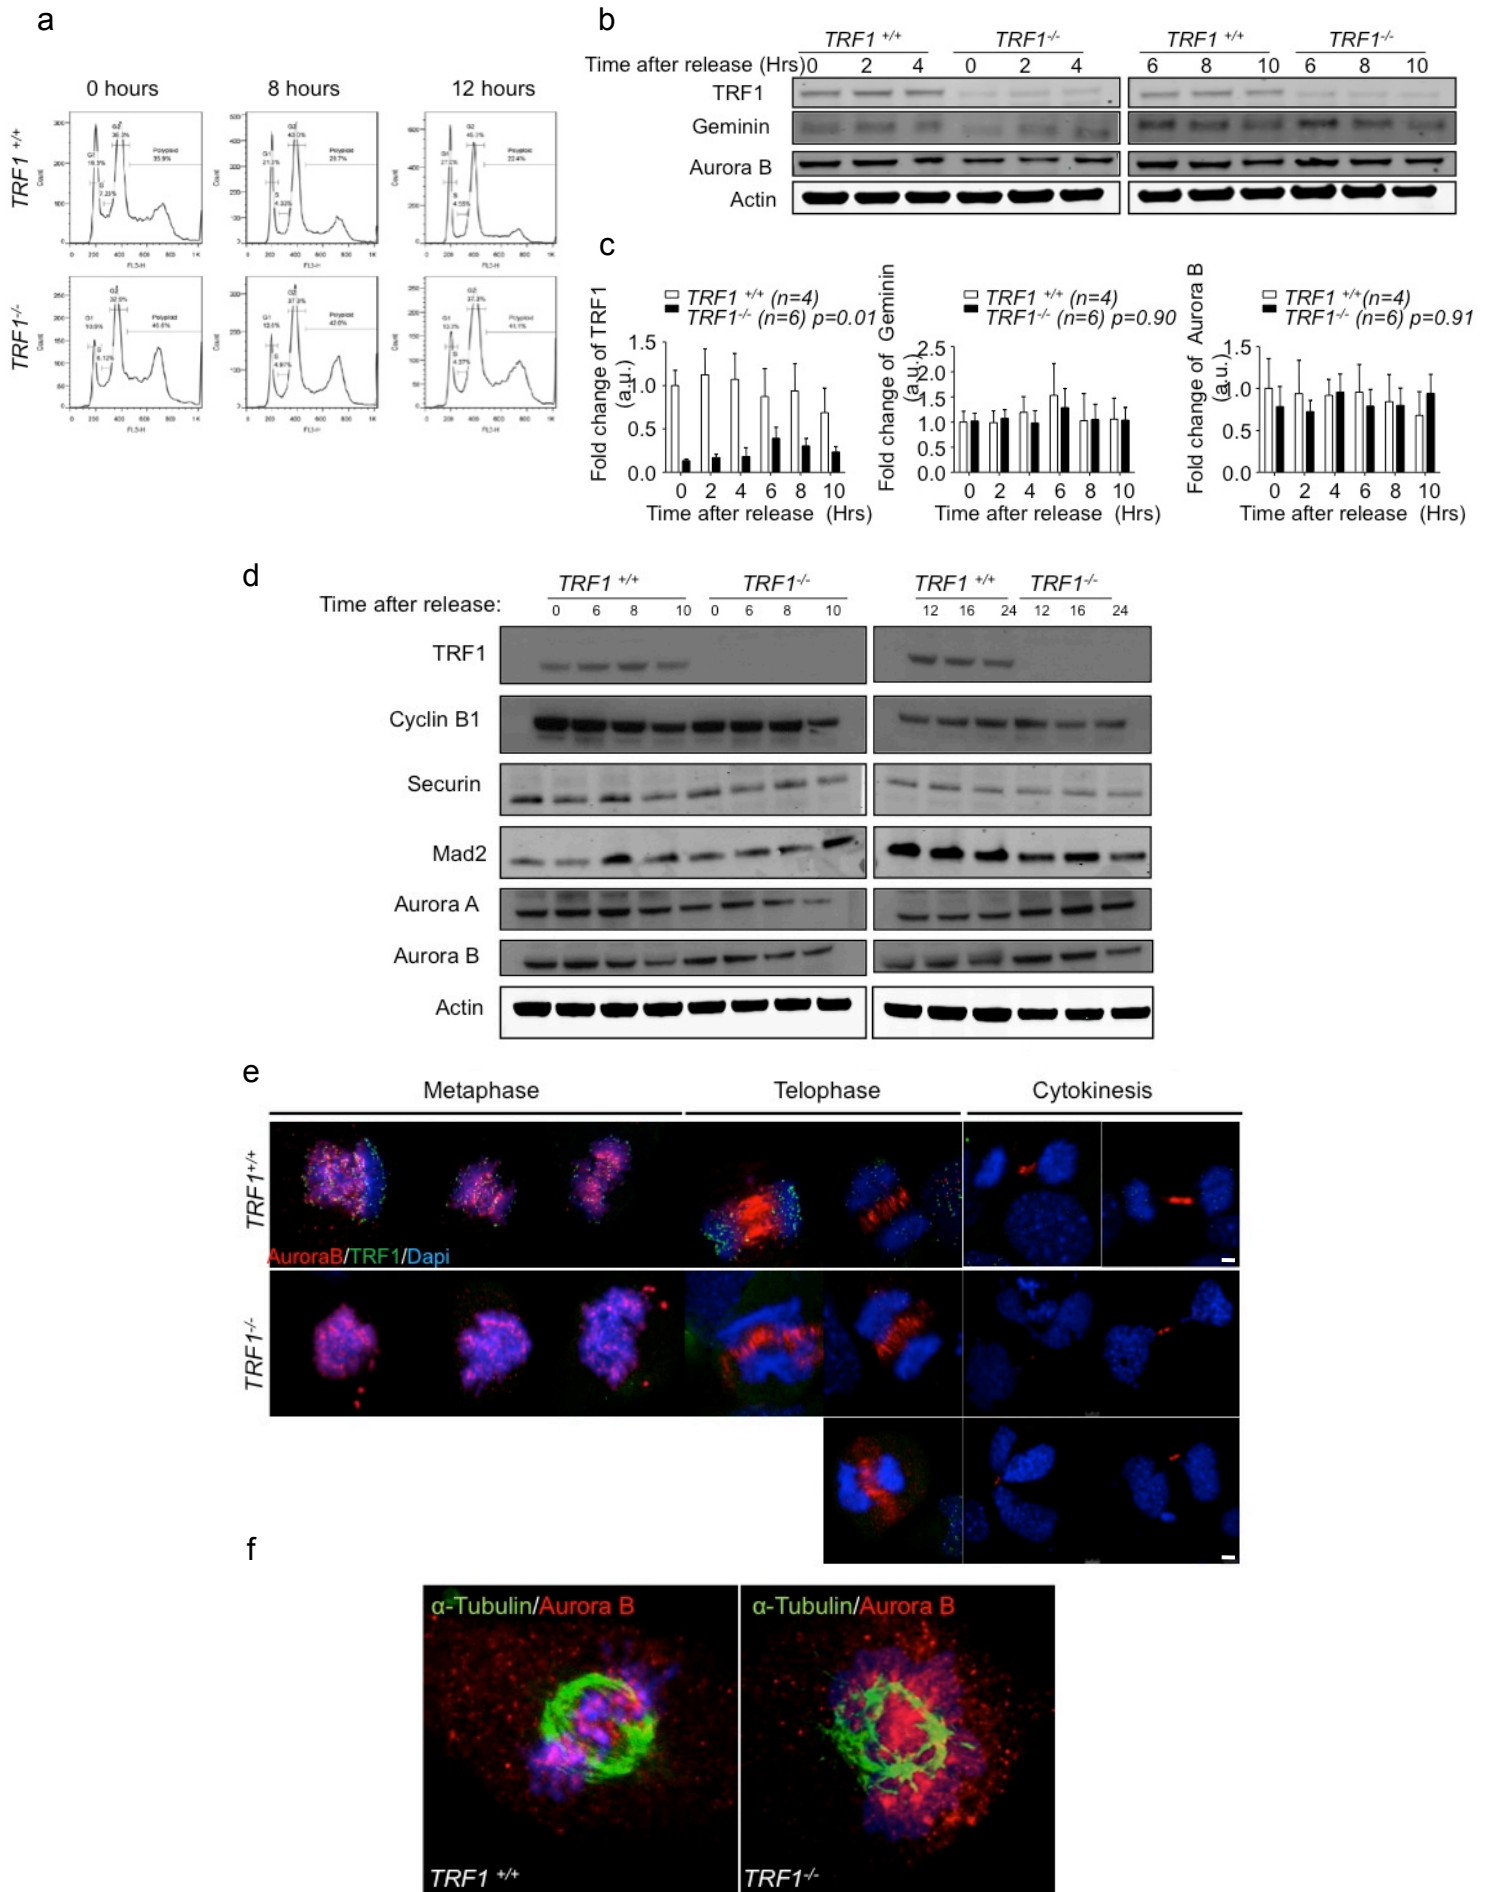

a

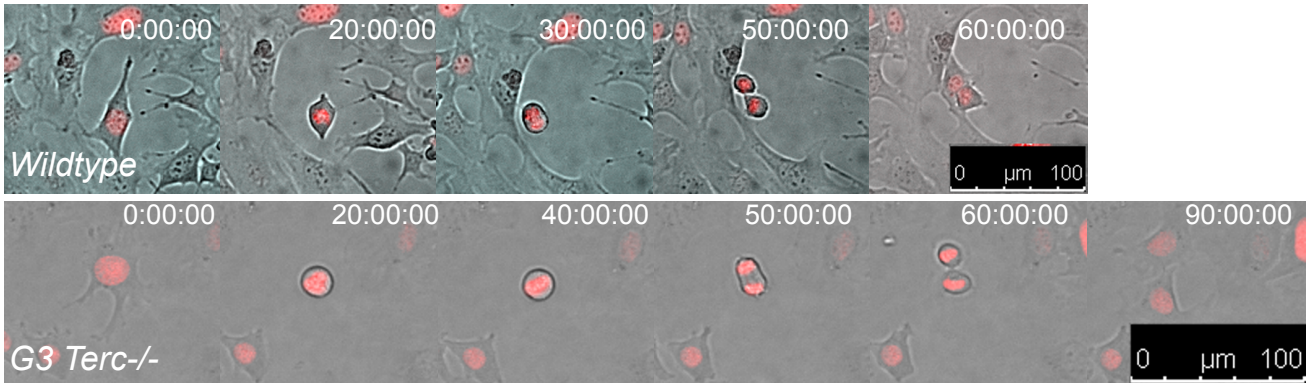

b

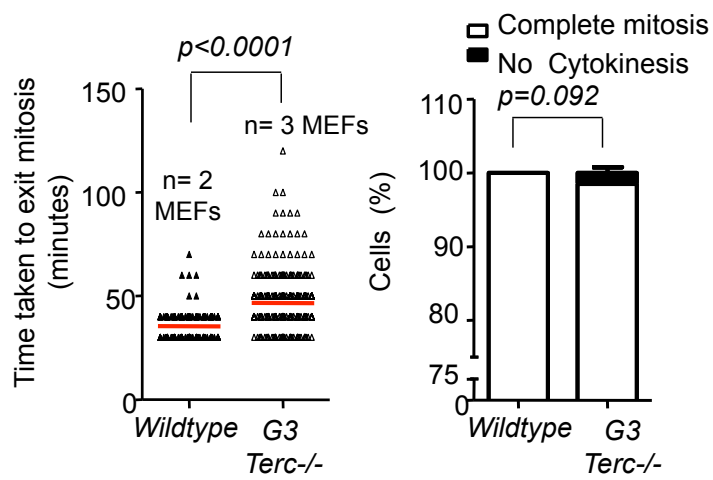

**Supplementary Figure 1 (a)** ChIP of *Trf1*<sup>+/+</sup> and *Trf1*<sup>-/-</sup>*p53*<sup>-/-</sup> MEFs using specific antibodies against Mad1, Mad2, BubR1 and TRF1 probed with centromeric major satellite probe. **(b)** ChIP of *Trf2*<sup>+/+</sup> and *Trf2*<sup>-/-</sup>*p53*<sup>-/-</sup> MEFs using specific antibodies against Mad1, BubR1, TopoII $\alpha$  and TRF1. The amount of immunoprecipitated telomere repeats was normalised to the amount of telomere repeats present in the chromatin fraction unbound to preimmune serum. n, independent MEFs used. Bars represent the average between replicates; standard error is used. Quantification of ChIP values is shown in the panel below. A Student's t test was used to calculate statistical significance. Representative Mad1, TopoII $\alpha$ , BubR1 and TRF1 with MEFs of the indicated genotypes are shown in the bottom panel.

**Supplementary Figure 2** TRF1 knockout cells display a mitotic phenotype. **(a)** Representative example of FACS histogram 8 days post selection. Right panel quantification of the percentage of polyploidy cells at the indicated time points post selection. Statistical significance was determined using a two way ANOVA giving a p value of 0.0165. **(b)** Quantification of the percentage of multinucleated cells in two independent *Trf1*<sup>+/+</sup> and *Trf1*<sup>-/-</sup> MEFs. Error bars represent standard error. Fisher exact test was used for statistical analysis and p values are indicated. **(c)** Representative images of immunofluorescence staining in *Trf1*<sup>+/+</sup> and *Trf1*<sup>-/-</sup> MEFs using TRF1 antibody (red), anti centromere antibody (green). Nuclei are counterstained with Dapi (blue). Bars = 50 $\mu$ M **(d)** Representative images of *Trf1*<sup>+/+</sup> and *Trf1*<sup>-/-</sup> MEFs stained with  $\gamma$ -Tubulin (red) and TRF1 (purple). Nuclei are counterstained with Dapi (blue). Right panel: quantification of the mean number of centrosomes per cell of four independent *Trf1*<sup>+/+</sup> and *Trf1*<sup>-/-</sup> MEFs. **(e)** Representative images of *Trf1*<sup>+/+</sup> and *Trf1*<sup>-/-</sup> MEFs stained with  $\gamma$ -Tubulin (red),  $\alpha$ -Tubulin (red) and TRF1 (purple) to show that multiple centrosomes are functional and not due to centrosomal fragmentation. Bars = 10 $\mu$ M.

**Supplementary Figure 3** TRF1 depletion does not affect APC target stability. **(a)** Representative example of FACS histograms over time upon release from thymidine double block of *Trf1*<sup>+/+</sup> and *Trf1*<sup>-/-</sup>*p53*<sup>-/-</sup> MEFs. **(b-d)** No abnormal stabilization of mitotic APC targets in *Trf1*<sup>-/-</sup> MEFs. *Trf1*<sup>+/+</sup> and *Trf1*<sup>-/-</sup> MEFs were treated with Cre and 2 days after selection synchronised in G1/S. The indicated proteins were analysed by immunoblotting. Quantification of indicated proteins relative to actin. Statistical significance determined by two-way ANOVA. p values indicated. n is the number of individual MEFs per genotype. **(e-f)** Representative immunofluorescence images of *Trf1*<sup>+/+</sup> and *Trf1*<sup>-/-</sup> MEFs stained with antibodies against TRF1 (green) and Aurora B (red) showing no alteration in the localization of Aurora B in the absence of TRF1. Bars = 7.5µM **(f)** Representative images of immunofluorescence images of *Trf1*<sup>+/+</sup> and *Trf1*<sup>-/-</sup> MEFs stained with Aurora B (red) and α-Tubulin (green) to emphasise the correct localization of Aurora B in cells lacking TRF1.

**Supplementary Figure 4 (a)** Representative time-lapse images of *wild-type* and *G3 Terc*<sup>-/-</sup>. Selected time points are shown. Cells are transfected with H2B-CHERRY (red) to stain DNA. **(b)** Quantification of the time taken to complete mitosis (left panel) and the percentage of cells that complete cytokinesis (right panel) of 3 independent *wild-type* and *G3 Terc*<sup>-/-</sup> MEFs. Error bars represent standard error. Student's t test or ANOVA were used for statistical analysis and p values are indicated.
